# Supplementary material
Source: PubMed Central journal article supplement (PMC5866591)
Supplement: pnas.201720324SI.pdf [file pnas.201720324SI.pdf]

# Supporting Information

Noh et al. 10.1073/pnas.1720324115

**Table S1. Molecular evolution of chimera-biased genes**

| Metric     | Chimera-biased genes |                      |                      | Genomic Background   |
|------------|----------------------|----------------------|----------------------|----------------------|
|            | All                  | Up-regulated         | Down-regulated       |                      |
| N          | 78                   | 19                   | 59                   | 11,241               |
| Dn         | 269                  | 52                   | 217                  | 37,595               |
| Ds         | 1,130                | 196                  | 934                  | 129,871              |
| Pn         | 62                   | 14                   | 48                   | 11,554               |
| Ps         | 159                  | 27                   | 132                  | 15,273               |
| $\alpha$   | 0.15 (−0.39; 0.86)   | 0.25 (−0.13; 0.91)   | 0.10 (−2.09; 1.00)   | −0.72 (−0.74; −0.48) |
| $\omega_a$ | 0.001 (−0.02; 0.06)  | 0.02 (−0.01; 0.06)   | 0.007 (−0.15; 0.07)  | −0.05 (−0.05; −0.03) |
| f          | 0.06 (0.01; 0.09)    | 0.05 (0.01; 0.07)    | 0.10 (0.00; 0.24)    | 0.14 (0.12; 0.14)    |
| $f_{st}$   | −0.18 (−0.25; −0.12) | −0.20 (−0.31; −0.08) | −0.18 (−0.26; −0.11) | −0.20 (−0.21; −0.19) |
| D          | −0.61 (−1.11; −0.09) | −0.65 (−1.08; −0.19) | −0.47 (−1.15; 0.41)  | −0.50 (−1.05; 0.12)  |
| H          | −0.27 (−0.70; 0.09)  | −0.36 (−0.79; 0.03)  | 0.08 (−0.28; 0.37)   | 0.02 (−0.39; 0.37)   |

N is the number of genes; Dn and Ds are the counts of nonsynonymous and synonymous divergent sites, respectively, summed across loci. Pn and Ps are the counts of nonsynonymous and synonymous polymorphic sites, respectively, summed across loci, including singletons and without any adjustment to the minor allele frequency. From the DFE- $\alpha$  program,  $\alpha$  is the proportion of nonsynonymous substitutions that are adaptive;  $\omega_a$  is the rate of adaptive substitution; and f is the fraction of nonsynonymous mutations. For these, we give the point estimate and 95% confidence interval in parentheses determined by bootstrapping 1,000 times across loci. For  $f_{st}$ , Tajima's D, and Fay and Wu's H, we give the mean followed by the 95% confidence interval determined by bootstrapping the mean 10,000 times across loci. For details, see *Methods*.

**Table S2. Polymorphism in genes expressed more in prespore and prestalk cells**

| Gene set                             | N      | Site class | bp         | $\pi$                                                                |
|--------------------------------------|--------|------------|------------|----------------------------------------------------------------------|
| <i>Without Vegetative Expression</i> |        |            |            |                                                                      |
| Prespore                             | 113    | Non        | 107,861    | $3.1 \times 10^{-4}$ ( $1.2 \times 10^{-5}$ ; $5.7 \times 10^{-4}$ ) |
|                                      |        | Syn        | 27,868     | $1.2 \times 10^{-3}$ ( $4.1 \times 10^{-4}$ ; $2.2 \times 10^{-3}$ ) |
| Prestalk                             | 145    | Non        | 90,571     | $2.4 \times 10^{-4}$ ( $6.7 \times 10^{-5}$ ; $5.3 \times 10^{-4}$ ) |
|                                      |        | Syn        | 24,368     | $1.3 \times 10^{-3}$ ( $3.3 \times 10^{-4}$ ; $2.8 \times 10^{-3}$ ) |
| Prespore + Prestalk                  | 258    | Non        | 198,432    | $2.7 \times 10^{-4}$ ( $8.9 \times 10^{-5}$ ; $5.4 \times 10^{-4}$ ) |
|                                      |        | Syn        | 52,236     | $1.2 \times 10^{-3}$ ( $3.7 \times 10^{-4}$ ; $2.5 \times 10^{-3}$ ) |
| <i>All</i>                           |        |            |            |                                                                      |
| Prespore                             | 879    | Non        | 1,336,265  | $2.2 \times 10^{-4}$ ( $8.9 \times 10^{-5}$ ; $4.3 \times 10^{-4}$ ) |
|                                      |        | Syn        | 347,860    | $1.0 \times 10^{-3}$ ( $5.3 \times 10^{-4}$ ; $1.7 \times 10^{-3}$ ) |
| Prestalk                             | 992    | Non        | 1,260,452  | $2.1 \times 10^{-4}$ ( $6.5 \times 10^{-5}$ ; $5.5 \times 10^{-4}$ ) |
|                                      |        | Syn        | 343,576    | $1.2 \times 10^{-3}$ ( $6.2 \times 10^{-4}$ ; $2.0 \times 10^{-3}$ ) |
| Prespore + Prestalk                  | 1,871  | Non        | 2,596,717  | $2.1 \times 10^{-4}$ ( $7.2 \times 10^{-5}$ ; $5.2 \times 10^{-4}$ ) |
|                                      |        | Syn        | 691,436    | $1.1 \times 10^{-3}$ ( $5.6 \times 10^{-4}$ ; $1.9 \times 10^{-3}$ ) |
| Genomic background                   | 11,241 | Non        | 15,102,488 | $1.9 \times 10^{-4}$ ( $5.9 \times 10^{-5}$ ; $4.5 \times 10^{-4}$ ) |
|                                      |        | Syn        | 3,964,090  | $9.1 \times 10^{-4}$ ( $4.2 \times 10^{-4}$ ; $1.6 \times 10^{-3}$ ) |

Two datasets are used: prespore/prestalk genes with no expression in vegetation cells and prespore/prestalk genes including those with vegetative expression (All). N refers to the numbers of genes in each dataset; Site Class refers to whether a polymorphic site is Non(synonymous) or Syn(onymous); bp is the total numbers of base pairs summed across loci;  $\pi$  is the Jukes-Cantor corrected pairwise nucleotide diversity, shown as the mean with the 95% confidence interval in parentheses as obtained by bootstrapping the mean 10,000 times. For details, see *Methods*.

**Table S3. Prestalk  $\pi_N$ : Prespore  $\pi_N$  bootstrap test results**

| Statistic                                                 | Prestalk $\pi_N$ : Prespore $\pi_N$ |                       |
|-----------------------------------------------------------|-------------------------------------|-----------------------|
|                                                           | Without vegetative expression       | All                   |
| Point estimate                                            | 0.771                               | 0.914                 |
| Mean (95% CI)                                             | 0.799 (0.422; 1.380)                | 0.919; (0.704; 1.170) |
| Maximum value                                             | 2.236                               | 1.478                 |
| Kin selection prediction $Y = 1.03$ bootstrap test result | $P = 0.33$                          | $P = 0.38$            |
| Kin selection prediction $Y = 1.17$ bootstrap test result | $P = 0.16$                          | $P = 0.055$           |
| Direct selection prediction $Y = 4$ bootstrap test result | $P \ll 0.001$                       | $P \ll 0.001$         |

Prestalk  $\pi_N$ : Prespore  $\pi_N$  is the ratio of nonsynonymous pairwise diversity for the prestalk genes to that of the prespore genes. Estimates are shown both for genes without vegetative expression and for all prestalk and prespore genes (as in Table S2). We show the mean of 10,000 bootstrapped ratios, the 95% confidence interval in parentheses, and the maximum ratio obtained by bootstrapping. Two-tailed  $P$  values for bootstrap tests against three predicted values,  $Y$ , come from doubling the percentage of values in the shorter tail of the bootstrapped distribution cut off by  $Y$ . For details, see *Methods*.

## Other Supporting Information Files

[Dataset S1 \(XLSX\)](#)
